# Supplementary material
Source: publisher site journal article supplement (https://www.spandidos-publications.com/5060/downloadSupplementary)
Supplement: Supplementary file 1 [file downloadSupplementary]

## Sheet: Sheet1
Table SI. Clinicopathological characteristics of the 30 patients with pancreatic adenocarcinoma.
Age	Sex	Stage	T	M	N	Tumor differentiation
49	Male	ⅡA	T3	M0	N0	Moderate
53	Female	ⅠA	T1	M0	N0	Poor
67	Male	ⅡA	T3	M0	N0	Moderate
44	Male	ⅡA	T3	M0	N0	Moderate
53	Female	ⅡB	T2	M0	N1	Poor
66	Male	ⅠB	T2	M0	N0	Moderate
59	Female	ⅡB	T1	M0	N1	Moderate
50	Female	Ⅳ	T3	M1	N0	Poor
65	Male	ⅡB	T2	M0	N1	Poor
58	Female	ⅡA	T3	M0	N0	Well
58	Male	ⅠA	T1	M0	N0	Poor
65	Female	Ⅲ	T4	M0	N0	Poor
62	Female	ⅡB	T2	M0	N1	Moderate
69	Male	ⅡA	T3	M0	N0	Well
50	Male	ⅠB	T2	M0	N0	Poor
63	Male	ⅡB	T3	M0	N1	Well
52	Male	ⅠB	T2	M0	N0	Poor
60	Male	ⅡA	T3	M0	N0	Poor
67	Male	ⅠB	T2	M0	N0	Moderate
58	Male	Ⅲ	T4	M0	N1	Moderate
59	Female	ⅡA	T3	M0	N0	Well
69	Male	ⅠB	T2	M0	N0	Poor
64	Male	Ⅲ	T4	M0	N1	Moderate
70	Female	ⅡA	T3	M0	N0	Poor
42	Male	ⅡA	T3	M0	N0	Well
44	Male	ⅡB	T1	M0	N1	Well
57	Female	ⅡB	T3	M0	N1	Moderate
42	Female	ⅡA	T3	M0	N0	Poor
56	Male	ⅠB	T2	M0	N0	Moderate
41	Male	ⅠA	T1	M0	N0	Poor
M, metastasis; N, node; T, tumor.
